# Supplementary material
Source: HighWire-hosted journal article supplement (https://www.cmajopen.ca/highwire/filestream/81013/field_highwire_adjunct_files/5/open-2015-0105-5-at.pdf)
Supplement: open-2015-0105-5-at.pdf [file open-2015-0105-5-at.pdf]

**Appendix 5 (as supplied by the authors):** Proportion of adults (secondary analysis) wearing protective equipment at the time of their traumatic brain injury hospitalization in the Terres-Cries-de-la-Baie-James.

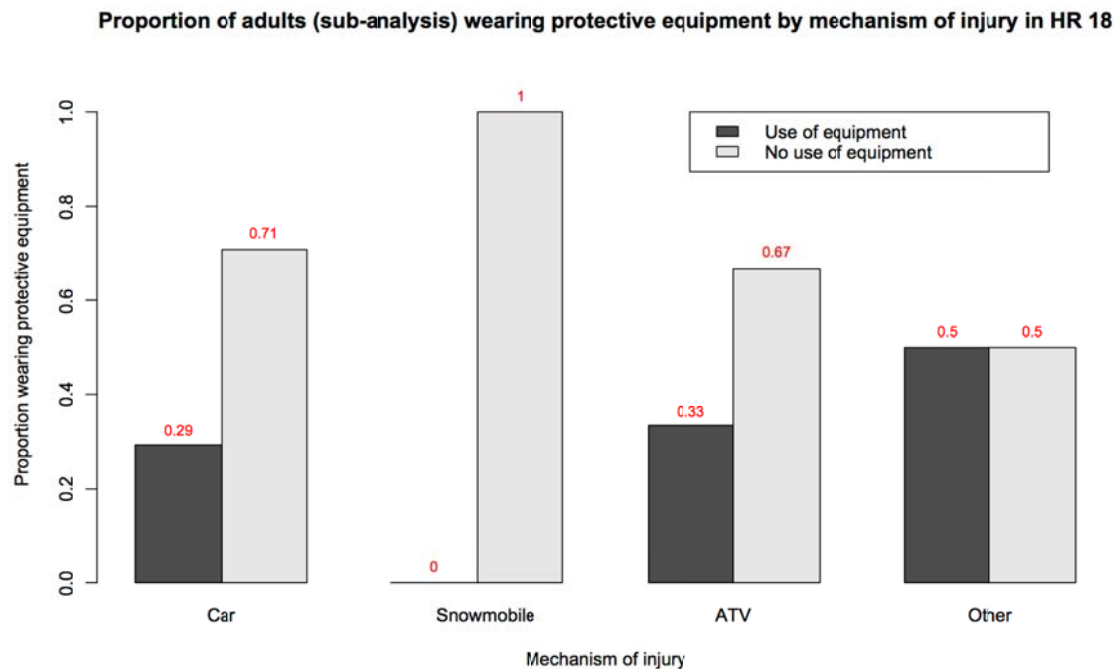

Patient involved in a recreational accident (sports/cycling) were the most likely to wear protective equipment. Most patients involved in motor vehicle collisions (car) and all-terrain vehicle collisions did not wear protective equipment (seatbelts and helmets, respectively). No patients involved in snowmobile accidents wore a helmet.
